# Supplementary material for: The Effect of Silicon on Osmotic and Drought Stress Tolerance in Wheat Landraces
Source: MDPI journal article supplement (doi:10.3390/plants10040814), 2021-04-20
Supplement: s1 [file s1]

**Table S1:** Shoot Si concentrations for the 98 landrace diversity panel. Landraces in bold were used for subsequent experiments. Landraces highlighted in bold were used for drought and osmotic stress experiments.

| Landrace        | Collection    | Plant ID        | Plant Name             | Origin              | Shoot Si Concentration (%)<br>(Mean $\pm$ SE) |             |             |             |
|-----------------|---------------|-----------------|------------------------|---------------------|-----------------------------------------------|-------------|-------------|-------------|
|                 |               |                 |                        |                     | 0 mM Si                                       |             | 1.5 mM Si   |             |
| YoGI_002        | CIMMYT        | BW 7112         | RA SHIH PAI PÂ'I       | China               | 0.47                                          | 0.03        | 0.99        | 0.07        |
| YoGI_003        | CIMMYT        | BW7227          | ARTEMOVKA              | Former Soviet Union | 0.41                                          | 0.08        | 0.86        | 0.05        |
| YoGI_006        | CIMMYT        | BW 15958        | V763.153               | Pakistan            | 0.49                                          | 0.12        | 1.00        | 0.07        |
| <b>YoGI_011</b> | <b>CIMMYT</b> | <b>CWI 2166</b> | <b>K7155.41</b>        | <b>Kenya</b>        | <b>0.52</b>                                   | <b>0.06</b> | <b>1.22</b> | <b>0.16</b> |
| YoGI_013        | CIMMYT        | CWI 2168        | K6995.4A               | Kenya               | 0.47                                          | 0.02        | 0.91        | 0.05        |
| <b>YoGI_015</b> | <b>CIMMYT</b> | <b>CWI 3909</b> | <b>OUBAARD</b>         | <b>South Africa</b> | <b>0.51</b>                                   | <b>0.04</b> | <b>1.03</b> | <b>0.08</b> |
| YoGI_021        | CIMMYT        | CWI 6075        | KOELZ W 9375:AE        | India               | 0.48                                          | 0.07        | 0.97        | 0.03        |
| YoGI_022        | CIMMYT        | CWI 6076        | KOELZ W 9376:AE        | India               | 0.46                                          | 0.06        | 1.10        | 0.07        |
| YoGI_028        | CIMMYT        | CWI 7129        | KOELZ W 11192:AE       | India               | 0.51                                          | 0.08        | 1.00        | 0.08        |
| YoGI_034        | CIMMYT        | CWI 9915        | ROOI KLEINKORING       | South Africa        | 0.47                                          | 0.05        | 0.94        | 0.08        |
| YoGI_038        | CIMMYT        | CWI 12335       | AUSTRAL                | Argentina           | 0.52                                          | 0.02        | 1.01        | 0.02        |
| YoGI_047        | CIMMYT        | CWI 13432       | WHITE FIFE             | Japan               | 0.43                                          | 0.05        | 0.85        | 0.10        |
| YoGI_051        | CIMMYT        | CWI 13629       | AMERICANO              | Uruguay             | 0.49                                          | 0.08        | 0.79        | 0.01        |
| YoGI_052        | CIMMYT        | CWI 13644       | RINK                   | United States       | 0.48                                          | 0.04        | 0.88        | 0.03        |
| YoGI_054        | CIMMYT        | CWI 13647       | NEW ZEALAND            | United States       | 0.54                                          | 0.04        | 1.13        | 0.08        |
| YoGI_059        | CIMMYT        | CWI 15005       | LAGEADINHO             | Brazil              | 0.47                                          | 0.06        | 0.89        | 0.05        |
| YoGI_064        | CIMMYT        | CWI 27304       | TAIAN-KEN              | Kenya               | 0.42                                          | 0.04        | 0.85        | 0.05        |
| YoGI_067        | CIMMYT        | CWI 31262       | KENYA                  | Australia           | 0.45                                          | 0.02        | 0.84        | 0.05        |
| YoGI_075        | CIMMYT        | CWI 52382       | OAX93.21.34            | Mexico              | 0.45                                          | 0.07        | 0.98        | 0.05        |
| YoGI_079        | CIMMYT        | CWI 53414       | NOVOMICHURINK A X      | Former Soviet Union | 0.44                                          | 0.04        | 0.93        | 0.04        |
| YoGI_081        | CIMMYT        | DW 4633         | AKBUGDAY               | Kyrgyzstan          | 0.57                                          | 0.11        | 0.89        | 0.09        |
| YoGI_085        | Watkins       | 1190014         | Sarajevo 4             | Yugoslavia          | 0.44                                          | 0.07        | 0.96        | 0.05        |
| YoGI_088        | Watkins       | 1190032         | Dehak                  | India               | 0.44                                          | 0.05        | 0.82        | 0.04        |
| YoGI_098        | Watkins       | 1190045         | Douchani               | Syria               | 0.41                                          | 0.05        | 1.00        | 0.03        |
| YoGI_103        | Watkins       | 1190091         | Rodi Garamseli         | India               | 0.50                                          | 0.06        | 1.08        | 0.05        |
| YoGI_104        | Watkins       | 1190092         | Desi                   | India               | 0.43                                          | 0.08        | 0.87        | 0.06        |
| YoGI_110        | Watkins       | 1190105         | Hâtif de Saône         | France              | 0.50                                          | 0.11        | 0.96        | 0.04        |
| YoGI_114        | Watkins       | 1190126         | Dolatkhani (white)     | India               | 0.42                                          | 0.05        | 0.82        | 0.02        |
| YoGI_118        | Watkins       | 1190141         | China 15               | China               | 0.44                                          | 0.02        | 0.87        | 0.07        |
| YoGI_130        | Watkins       | 1190181         | Kujawianka Wieclawicka | Poland              | 0.40                                          | 0.07        | 0.88        | 0.08        |
| YoGI_133        | Watkins       | 1190190         | Roux de Presles        | France              | 0.46                                          | 0.06        | 0.98        | 0.05        |
| YoGI_134        | Watkins       | 1190191         | Rouge des Ardennes     | France              | 0.42                                          | 0.03        | 0.89        | 0.01        |

|                 |                |                |                                         |                |             |             |             |             |
|-----------------|----------------|----------------|-----------------------------------------|----------------|-------------|-------------|-------------|-------------|
| <b>YoGI_135</b> | <b>Watkins</b> | <b>1190195</b> | <b>Gahu (Nepali) or Kyo (Sikkimese)</b> | <b>India</b>   | <b>0.40</b> | <b>0.04</b> | <b>0.98</b> | <b>0.01</b> |
| YoGI_142        | Watkins        | 1190218        | Sbei Noir                               | Tunisia        | 0.42        | 0.04        | 0.94        | 0.05        |
| YoGI_143        | Watkins        | 1190219        | Alicante 1                              | Spain          | 0.55        | 0.05        | 1.10        | 0.08        |
| YoGI_144        | Watkins        | 1190223        | Shan wheat                              | Burma          | 0.44        | 0.05        | 0.93        | 0.05        |
| YoGI_152        | Watkins        | 1190246        | Soor Ghanum                             | India          | 0.59        | 0.06        | 1.12        | 0.08        |
| YoGI_156        | Watkins        | 1190273        | Seville 17                              | Spain          | 0.40        | 0.06        | 0.82        | 0.04        |
| YoGI_162        | Watkins        | 1190299        | Smyrna 6                                | Turkey         | 0.49        | 0.05        | 0.91        | 0.05        |
| YoGI_164        | Watkins        | 1190305        | Sinai 1                                 | Egypt          | 0.43        | 0.05        | 0.97        | 0.04        |
| YoGI_168        | Watkins        | 1190319        | China 15                                | China          | 0.43        | 0.08        | 0.86        | 0.09        |
| YoGI_169        | Watkins        | 1190320        | China 2                                 | China          | 0.45        | 0.06        | 1.05        | 0.09        |
| YoGI_170        | Watkins        | 1190323        | China 14                                | China          | 0.44        | 0.03        | 0.91        | 0.05        |
| YoGI_171        | Watkins        | 1190324        | China 20                                | China          | 0.49        | 0.07        | 0.94        | 0.04        |
| YoGI_172        | Watkins        | 1190325        | 1190325                                 | United Kingdom | 0.49        | 0.05        | 0.91        | 0.05        |
| YoGI_178        | Watkins        | 1190336        | Hungary 2                               | Hungary        | 0.43        | 0.02        | 1.00        | 0.02        |
| YoGI_181        | Watkins        | 1190349        | Golema Franga                           | Bulgaria       | 0.44        | 0.09        | 0.92        | 0.02        |
| YoGI_182        | Watkins        | 1190352        | Sarajevo 8                              | Yugoslavia     | 0.45        | 0.04        | 1.11        | 0.05        |
| YoGI_186        | Watkins        | 1190374        | Sarakhs                                 | Iran           | 0.47        | 0.03        | 1.00        | 0.13        |
| YoGI_189        | Watkins        | 1190396        | Trigo Rietti                            | Portugal       | 0.40        | 0.04        | 0.89        | 0.08        |
| YoGI_190        | Watkins        | 1190397        | Trigo Ribeiro                           | Portugal       | 0.47        | 0.03        | 0.92        | 0.03        |
| YoGI_191        | Watkins        | 1190398        | Abu Fashi                               | Palestine      | 0.48        | 0.06        | 1.05        | 0.12        |
| YoGI_193        | Watkins        | 1190406        | Desi                                    | India          | 0.51        | 0.06        | 0.93        | 0.10        |
| YoGI_196        | Watkins        | 1190420        | Dhanias                                 | India          | 0.43        | 0.03        | 0.87        | 0.08        |
| YoGI_197        | Watkins        | 1190433        | Soor Ghanum                             | India          | 0.48        | 0.06        | 0.89        | 0.02        |
| YoGI_198        | Watkins        | 1190436        | China Sh108                             | China          | 0.41        | 0.03        | 0.93        | 0.06        |
| YoGI_202        | Watkins        | 1190450        | Miercurea Ciucului                      | Romania        | 0.42        | 0.04        | 0.70        | 0.04        |
| YoGI_203        | Watkins        | 1190451        | Samanta 117                             | Romania        | 0.46        | 0.04        | 0.79        | 0.06        |
| YoGI_207        | Watkins        | 1190468        | Afghanistan 46                          | Afghanistan    | 0.48        | 0.04        | 0.89        | 0.08        |
| YoGI_210        | Watkins        | 1190474        | Afghanistan 109                         | Afghanistan    | 0.43        | 0.07        | 0.87        | 0.07        |
| YoGI_215        | Watkins        | 1190483        | Surka Oscista                           | Poland         | 0.42        | 0.04        | 1.04        | 0.13        |
| <b>YoGI_221</b> | <b>Watkins</b> | <b>1190521</b> | <b>Dandi</b>                            | <b>India</b>   | <b>0.50</b> | <b>0.06</b> | <b>0.95</b> | <b>0.05</b> |
| <b>YoGI_227</b> | <b>Watkins</b> | <b>1190568</b> | <b>China 19</b>                         | <b>China</b>   | <b>0.43</b> | <b>0.05</b> | <b>0.89</b> | <b>0.05</b> |
| <b>YoGI_231</b> | <b>Watkins</b> | <b>1190605</b> | <b>Karabash</b>                         | <b>Greece</b>  | <b>0.41</b> | <b>0.05</b> | <b>0.92</b> | <b>0.08</b> |
| YoGI_235        | Watkins        | 1190627        | Persia 45                               | Iran           | 0.48        | 0.05        | 0.95        | 0.07        |
| YoGI_237        | Watkins        | 1190636        | Native hard                             | Tunisia        | 0.45        | 0.04        | 0.82        | 0.06        |
| YoGI_240        | Watkins        | 1190645        | Mundia                                  | India          | 0.45        | 0.05        | 1.00        | 0.06        |
| YoGI_242        | Watkins        | 1190652        | China Sh107                             | China          | 0.44        | 0.03        | 0.95        | 0.06        |
| <b>YoGI_243</b> | <b>Watkins</b> | <b>1190662</b> | <b>Samanta 1252</b>                     | <b>Romania</b> | <b>0.42</b> | <b>0.03</b> | <b>0.84</b> | <b>0.02</b> |
| YoGI_249        | Watkins        | 1190670        | Zlotka Miczynskiego                     | Poland         | 0.42        | 0.03        | 0.83        | 0.04        |
| YoGI_255        | Watkins        | 1190685        | Trigo duos                              | Spain          | 0.44        | 0.04        | 0.86        | 0.00        |
| YoGI_257        | Watkins        | 1190694        | Lyallpur 8A                             | India          | 0.49        | 0.02        | 0.96        | 0.03        |
| YoGI_259        | Watkins        | 1190700        | Kaifeng 323-9                           | China          | 0.44        | 0.05        | 0.89        | 0.09        |

|                 |                |                       |                    |                 |             |             |             |             |
|-----------------|----------------|-----------------------|--------------------|-----------------|-------------|-------------|-------------|-------------|
| YoGI_261        | Watkins        | 1190705               | Kooseh             | Iran            | 0.44        | 0.06        | 0.85        | 0.02        |
| YoGI_265        | Watkins        | 1190729               | Gandum-i-Jiruft    | Iran            | 0.44        | 0.03        | 0.78        | 0.01        |
| YoGI_270        | Watkins        | 1190740               | Siberia W94421     | USSR            | 0.49        | 0.10        | 0.89        | 0.02        |
| <b>YoGI_277</b> | <b>Watkins</b> | <b>1190751</b>        | <b>Armavir</b>     | <b>USSR</b>     | <b>0.40</b> | <b>0.07</b> | <b>0.80</b> | <b>0.08</b> |
| YoGI_280        | Watkins        | 1190755               | Crimea W94465      | USSR            | 0.42        | 0.04        | 0.88        | 0.06        |
| YoGI_285        | Watkins        | 1190772               | Yenisei W43320     | USSR            | 0.50        | 0.04        | 0.87        | 0.04        |
| <b>YoGI_286</b> | <b>Watkins</b> | <b>1190777</b>        | <b>Finland 3</b>   | <b>Finland</b>  | <b>0.48</b> | <b>0.05</b> | <b>0.94</b> | <b>0.05</b> |
| YoGI_287        | Watkins        | 1190779               | Tulun 458          | USSR            | 0.44        | 0.07        | 0.83        | 0.02        |
| YoGI_291        | Watkins        | 1190784               | Oberdan            | Italy           | 0.45        | 0.03        | 0.87        | 0.02        |
| YoGI_298        | Watkins        | 1190810               | Turkestan W84532   | USSR            | 0.47        | 0.05        | 0.93        | 0.08        |
| YoGI_299        | Watkins        | 1190811               | Algeria W7558      | Tunisia         | 0.59        | 0.14        | 0.97        | 0.11        |
| YoGI_313        | Prague         | 01C0200519            | Eritrospermum 5755 | Uzbekistan      | 0.47        | 0.03        | 0.87        | 0.04        |
| YoGI_320        | Prague         | 01C0203773            | Jade               | Saudi Arabia    | 0.50        | 0.06        | 0.98        | 0.03        |
| YoGI_324        | Prague         | 01C0202172            | MCB 192            | Peru            | 0.50        | 0.02        | 1.03        | 0.08        |
| YoGI_328        | Prague         | 01C0201384            | Nohoean            | Norway          | 0.44        | 0.02        | 0.86        | 0.02        |
| YoGI_329        | Prague         | 01C0201385            | Nora               | Norway          | 0.44        | 0.06        | 0.88        | 0.05        |
| <b>YoGI_330</b> | <b>Prague</b>  | <b>01C0201531</b>     | <b>Orchon</b>      | <b>Mongolia</b> | <b>0.56</b> | <b>0.08</b> | <b>1.01</b> | <b>0.05</b> |
| YoGI_334        | Prague         | 01C0202818            | Suwon 222          | Korea           | 0.50        | 0.02        | 0.95        | 0.07        |
| YoGI_336        | IBTI           | Unknown               | Apache USA         | Unknown         | 0.47        | 0.03        | 1.14        | 0.07        |
| YoGI_343        | IBTI           | GedifluxRL (id#40001) | Muck               | Germany         | 0.47        | 0.03        | 0.91        | 0.04        |
| YoGI_345        | IBTI           | GedifluxRL (id#39977) | STAMM-101          | Austria         | 0.45        | 0.03        | 0.99        | 0.05        |
| YoGI_348        | IBTI           | GedifluxRL (id#39779) | Vilmorin-27        | France          | 0.46        | 0.04        | 0.94        | 0.02        |
| YoGI_349        | IBTI           | GedifluxRL (id#40037) | Shamrock           | United Kingdom  | 0.49        | 0.03        | 1.15        | 0.07        |
| YoGI_350        | IBTI           | Unknown               | Paragon control    | Unknown         | 0.47        | 0.04        | 0.88        | 0.07        |

**Table S2:** ANOVA for the effect of Si fertilisation, and landrace or Si accumulation type, and their interactions on tissue Si contents of plants grown in compost or hydroponics. Data were used to select landraces that varied consistently in their Si accumulation. Replicate was included as a random effect.

|                   |                   | Compost; shoot Si level |        |         | Hydroponics; shoot Si level |         |         | Hydroponics; root Si level |       |         |
|-------------------|-------------------|-------------------------|--------|---------|-----------------------------|---------|---------|----------------------------|-------|---------|
|                   |                   | Df                      | F      | p       | Df                          | F       | p       | Df                         | F     | p       |
| Landrace          | Landrace          | 9                       | 3.16   | 0.006   | 9                           | 18.02   | < 0.001 | 9                          | 3.34  | 0.002   |
|                   | Si fertilisation  | 1                       | 346.08 | < 0.001 | 3                           | 2193.13 | < 0.001 | 3                          | 49.64 | < 0.001 |
|                   | Replicate         | 2                       | 4.14   | 0.024   | 3                           | 53.16   | < 0.001 | 3                          | 1.26  | 0.296   |
|                   | Landrace x Si     | 9                       | 0.54   | 0.838   | 27                          | 2.06    | 0.004   | 25                         | 1.99  | 0.012   |
| Accumulation type | Accumulation type | 1                       | 13.41  | < 0.001 | 1                           | 74.66   | < 0.001 | 1                          | 13.76 | < 0.001 |
|                   | Si fertilisation  | 1                       | 327.50 | < 0.001 | 3                           | 1841.11 | < 0.001 | 3                          | 48.17 | < 0.001 |
|                   | Replicate         | 2                       | 3.92   | 0.026   | 3                           | 42.20   | < 0.001 | 3                          | 1.15  | 0.332   |
|                   | Accumulation x Si | 1                       | 0.04   | 0.837   | 3                           | 6.79    | < 0.001 | 3                          | 4.26  | 0.007   |

**Table S3:** ANOVA for osmotic stress, Si fertilisation, and Si accumulation type, and their interactions on shoot dry weight, Si concentration, and stress tolerance in hydroponic-grown plants. Replicate was included as a random effect to account for variability between plants grown at different times.

|                            | Shoot dry weight |               |                   | Shoot Si concentration |                |                   | Root Si concentration |              |                   | Stress tolerance |              |                   |
|----------------------------|------------------|---------------|-------------------|------------------------|----------------|-------------------|-----------------------|--------------|-------------------|------------------|--------------|-------------------|
|                            | Df               | F             | p                 | Df                     | F              | p                 | Df                    | F            | p                 | Df               | F            | p                 |
| Accumulation type          | 1                | <b>4.15</b>   | <b>0.043</b>      | 1                      | <b>68.74</b>   | <b>&lt; 0.001</b> | 1                     | <b>2.20</b>  | <b>0.140</b>      | 1                | 2.50         | 0.119             |
| Si fertilisation           | 1                | <b>6.51</b>   | <b>0.012</b>      | 1                      | <b>3195.82</b> | <b>&lt; 0.001</b> | 1                     | <b>43.70</b> | <b>&lt; 0.001</b> | 1                | 0.334        | 0.565             |
| Stress treatment           | 1                | <b>623.96</b> | <b>&lt; 0.001</b> | 1                      | <b>48.01</b>   | <b>&lt; 0.001</b> | 1                     | <b>0.55</b>  | <b>0.459</b>      |                  |              |                   |
| Replicate                  | 3                | <b>64.43</b>  | <b>&lt; 0.001</b> | 3                      | <b>16.14</b>   | <b>&lt; 0.001</b> | 3                     | 2.51         | 0.062             | 3                | <b>17.78</b> | <b>&lt; 0.001</b> |
| Accumulation x Si          | 1                | 0.42          | 0.518             | 1                      | <b>22.20</b>   | <b>&lt; 0.001</b> | 1                     | 0.10         | 0.752             | 1                | 0.40         | 0.530             |
| Accumulation x Stress      | 1                | 0.003         | 0.954             | 1                      | 1.10           | 0.296             | 1                     | 0.00         | 0.994             |                  |              |                   |
| Si x Stress                | 1                | 0.845         | 0.359             | 1                      | <b>31.05</b>   | <b>&lt; 0.001</b> | 1                     | <b>4.11</b>  | <b>0.045</b>      |                  |              |                   |
| Accumulation x Si x Stress | 1                | 0.187         | 0.666             | 1                      | 0.93           | 0.337             | 1                     | 0.99         | 0.322             |                  |              |                   |

**Table S4:** ANOVA for drought stress, Si fertilisation, and Si accumulation type, and their interactions on shoot dry weight, Si concentration, and stress tolerance in compost-grown plants. Replicate was included as a random effect to account for variability between plants grown at different times.

|                            | Shoot dry weight |               |                   | Shoot Si concentration |               |                   | Stress tolerance |             |                   |
|----------------------------|------------------|---------------|-------------------|------------------------|---------------|-------------------|------------------|-------------|-------------------|
|                            | Df               | F             | p                 | Df                     | F             | P                 | Df               | F           | P                 |
| Accumulation type          | 1                | 0.18          | 0.673             | 1                      | <b>162.16</b> | <b>&lt; 0.001</b> | 1                | 0.81        | 0.370             |
| Si fertilisation           | 1                | 0.02          | 0.899             | 1                      | <b>540.44</b> | <b>&lt; 0.001</b> | 1                | 0.21        | 0.651             |
| Stress treatment           | 1                | <b>165.75</b> | <b>&lt; 0.001</b> | 1                      | <b>8.36</b>   | <b>0.004</b>      |                  |             |                   |
| Replicate                  | 3                | <b>80.95</b>  | <b>&lt; 0.001</b> | 3                      | <b>95.52</b>  | <b>&lt; 0.001</b> | 3                | <b>8.56</b> | <b>&lt; 0.001</b> |
| Accumulation x Si          | 1                | 0.01          | 0.923             | 1                      | <b>4.57</b>   | <b>0.033</b>      | 1                | 0.01        | 0.922             |
| Accumulation x Stress      | 1                | 0.03          | 0.873             | 1                      | 0.33          | 0.565             |                  |             |                   |
| Si x Stress                | 1                | 0.27          | 0.603             | 1                      | <b>5.29</b>   | <b>0.022</b>      |                  |             |                   |
| Accumulation x Si x Stress | 1                | 0.16          | 0.690             | 1                      | 0.02          | 0.877             |                  |             |                   |

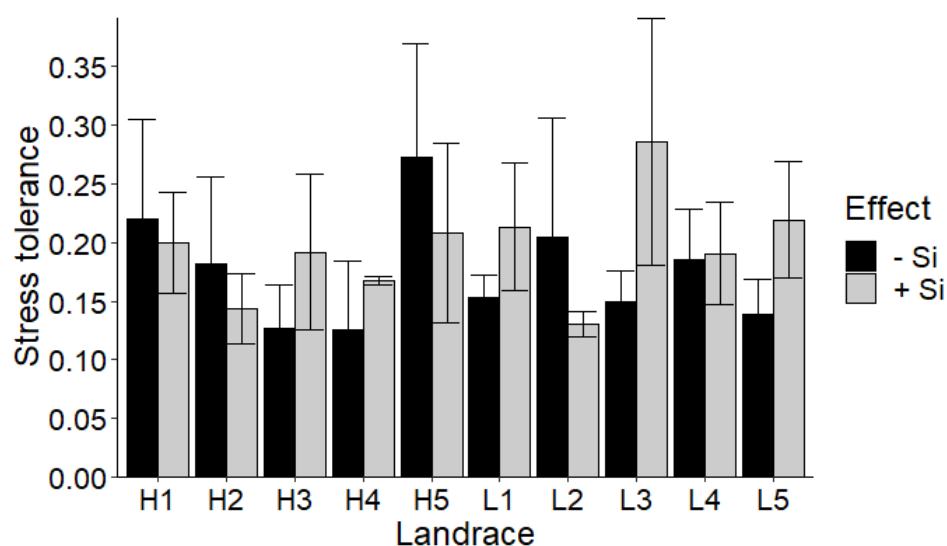

**Figure S1:** The impact of Si fertilisation on individual wheat landraces under osmotic stress. Stress tolerance was defined as shoot dry weight during osmotic stress divided by shoot dry weight in the control. Paired t-tests were used to compare the stress tolerance for – Si and + Si plants for each landrace. The effect of Si was not significant for any landrace ( $p > 0.05$ ). Mean values  $\pm$  SE are shown. N = 4.

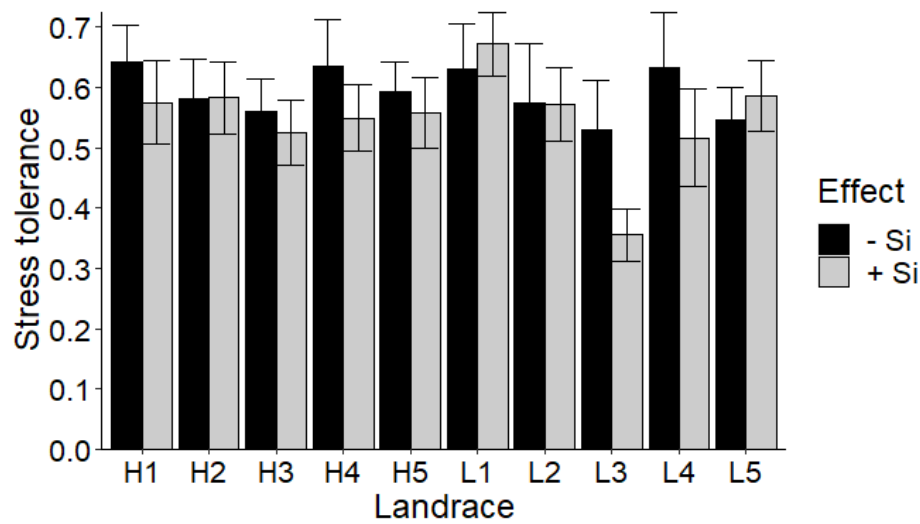

**Figure S2:** The impact of Si fertilisation on individual wheat landraces under drought stress. Stress tolerance was defined as shoot dry weight during drought stress divided by shoot dry weight in the control. Paired t-tests were used to compare the stress tolerance for – Si and + Si plants for each landrace. The effect of Si was not significant for any landrace ( $p > 0.05$ ). Mean values  $\pm$  SE are shown. N = 4.
